# Supplementary material for: Non-fullerene electron acceptors with benzotrithiophene with π-extension terminal groups for the development of high-efficiency organic solar cells
Source: Royal Society of Chemistry journal article supplement (doi:10.1039/d1tc03259c), 2021-01-01
Supplement: d1tc03259c1.pdf [file d1tc03259c1.pdf]

## Supporting Information

### **A Non-fullerene Electron Acceptor with Benzotrithiophene and $\pi$ - Extension Terminal Group for Development of High-Efficiency Organic Solar Cells**

Shanshan Ma, Qiri Huang, Yuanying Liang, Haoran Tang, Yanwei Chen, Jie Zhang,\*  
Kai Zhang, Fei Huang\* and Yong Cao

Institute of Polymer Optoelectronic Materials and Devices, State Key Laboratory of  
Luminescent Materials and Devices, South China University of Technology,  
Guangzhou 510640, People's Republic of China. E-mail: msjzhang@scut.edu.cn. (J.  
Z.); msfhuang@scut.edu.cn (F.H.).

- 1. General Measurements**
- 2. Device Fabrication and Characterization**
- 3. Materials and Synthesis**
- 4. Thermal Properties**
- 5. DFT calculation**
- 6. Hole and Electron Mobility**
- 7. Film Microstructure and Morphology**
- 8. Device Data**
- 9. References**

## 1. General Measurements

NMR spectra of  $^1\text{H}$  NMR and  $^{13}\text{C}$  NMR were recorded on Bruker AVANCE 500 NMR spectrometer with tetramethylsilane (TMS) as the internal reference. MALDI-TOF spectra were measured by a Bruker BIFLEX III mass spectrometer. Thermogravimetric (TG) measurements were carried out with a NETZSCH (TG209F3) apparatus at a heating rate of  $20\text{ }^\circ\text{C min}^{-1}$  in nitrogen atmosphere. Differential scanning calorimetry (DSC) measurements were performed on a NETZSCH (DSC200F3) apparatus under a nitrogen atmosphere. The samples were placed in lidded  $40\text{ }\mu\text{L}$  Al pans and thermally cycled two times with a heating/cooling rate of  $10/20\text{ }^\circ\text{C min}^{-1}$  for the first cycle and a heating/cooling rate of  $10/40\text{ }^\circ\text{C min}^{-1}$  for the second cycle, respectively. UV-vis absorption spectrums were recorded on a SHIMADZU UV-3600 spectrophotometer. Photoluminescence was measured with a SHIMADZU RF-5301PC fluorimeter. The ground state geometry of molecular was optimized by using the Density Functional Theory (DFT) method at a B3LYP/6-31 G (d, p) level. All the calculations of the acceptor molecules were performed using the Gaussian 16 package. Cyclic voltammetry (CV) measurements were carried out on a CHI660A electrochemical workstation at a scan rate of  $100\text{ mV s}^{-1}$  by using a platinum electrode as counter electrode, a saturated calomel electrode as reference electrode, and nitrogen-saturated  $0.1\text{ M}$  tetrabutylammonium hexafluorophosphate in acetonitrile as electrolyte. The ferrocene/ferrocenium ( $\text{Fc}/\text{Fc}^+$ ) was used as a reference and the potential was  $0.39\text{ V}$ .

The  $E_{\text{HOMO}}$  and  $E_{\text{LUMO}}$  were caculated according to equations:

$$E_{\text{HOMO}} = -e[E_{\text{ox}} + \left(4.8 - \frac{F_c}{F_c^+}\right)] \quad \text{and} \quad E_{\text{LUMO}} = -e[-E_{\text{red}} + \left(4.8 - \frac{F_c}{F_c^+}\right)]. \quad \text{Atomic force}$$

microscopy (AFM) characteristics were carried out on a NanoMan VS microscope in the tapping mode. High-resolution transmission electron microscopy (TEM) images were obtained from a JEM-2100F instrument. Grazing incidence wide-angle X-ray scattering (GIWAXS) measurements were performed on a Xenocs Xeuss 2.0 system with an Excillum MetalJet-D2 X-ray source at 70.0 kV, 2.8570 mA, and a wavelength of 1.34144 Å. The sample to detector distance was ~218.18 mm and the incidence angle was 0.20°. Scattering images were recorded using a DECTRIS PILATUS3 R 1M area detector with a pixel size of 0.172 mm by 0.172 mm. Samples were prepared by spin-coating neat non-fused FEA or blend solutions on PEDOT:PSS/silicon wafer substrates.

**Transient Photocurrent and Transient Photovoltage Measurements:** The transient photocurrent (TPC) characteristics of devices were measured by applying 500 nm laser pulses with a pulse width of 120 fs and a low pulse energy to the short-circuit current devices in dark. The laser pulses were generated from optical parametric amplifier (TOPAS-Prime) pumped by a mode-locked Ti: sapphire oscillator seeded regenerative amplifier with a pulse energy of 1.3 mJ at 800 nm and a repetition rate of 1 kHz (Spectra Physics Spitfire Ace). The charge extraction time was extracted from the fitting line of the TPC signal with equation:  $\delta I = A \exp(t/T)$ , where  $A$  is a constant that fits to the peak high,  $t$  is time, and  $T$  is the charge extraction time constant.

Hole-only devices (ITO/PEDOT:PSS/Active Layer/MoO<sub>3</sub>/Ag) and electron-only devices (ITO/ZnO/Active Layer/PFN-Br/Ag) were fabricated to evaluate the hole and electron mobilities ( $\mu_h$  and  $\mu_e$ ) of blend films by the space-charge limited current

(SCLC) model. The mobilities were determined by fitting the dark current based on a single-carrier SCLC model, which is described by the following equation:

$J = \frac{9}{8} \epsilon_0 \epsilon_r \mu_0 \frac{V^2}{d^3}$ , where  $J$  is the current,  $\mu_0$  is the carrier mobility,  $\epsilon_0$  is the permittivity of free space,  $\epsilon_r$  is the relative permittivity of the material,  $d$  is the thickness of the active layer, and  $V$  is the effective voltage. The effective voltage ( $V_{eff}$ ) was obtained by subtracting the built-in voltage ( $V_{bi}=0$ ) and the voltage drop ( $V_s=10 \times I$ , where the value 10 is the resistance of MoO<sub>3</sub> and  $I$  is the current of the devices in this work) from the applied voltage ( $V_{appl}$ ), that is:  $V_{eff} = V_{appl} - V_{bi} - V_s$ .

## 2. Device Fabrication and Characterization

Organic solar cells (OSCs) were fabricated with a conventional structure of ITO/PEDOT:PSS/Active Layer/PFN-Br/Ag. The OSCs were prepared by the following procedures. The indium tin oxide (ITO) patterned glass substrate was firstly cleaned with ultrasonic treatment in detergent, deionized water, acetone, ethanol, and isopropyl alcohol sequentially, and dried in an ultraviolet-ozone chamber for 20 min. PEDOT:PSS solution filtered with a 0.45  $\mu\text{m}$  PES filter was then spin-coated on the pre-cleaned ITO substrate at 3500 rpm for 30 s to obtain a film with thickness of  $\sim 40$  nm, followed by baking at 150  $^{\circ}\text{C}$  for 15 min in air. Afterwards, the substrates were transferred into a nitrogen ( $\text{N}_2$ ) protected glove-box for further fabrication processes. The active layers was prepared by spin coating PBDB-T:A (weight ratio 1:1.50) in CB solution on the obtained substrates with a final layer thicknesses of about 100 nm, which was then thermally treated at 100  $^{\circ}\text{C}$  for 10 minutes in a nitrogen atmosphere. Thereafter, a 5 nm PFN-Br layer was obtained by spin-coating PFN-Br/methanol

solution onto the abovementioned active layer. Finally, Ag electrode with a thickness of 100 nm was thermally deposited on the as prepared device through a shadow mask using a vacuum evaporator system under  $10^{-7}$  Pa. The resultant active area of the device was  $0.04 \text{ cm}^2$ .

The current–voltage ( $J$ – $V$ ) characteristics were measured on a computer-controlled Keithley 2400 source meter under 1 sun, AM 1.5 G spectra from a class solar simulator (Taiwan, Enlitech), and the light intensity was  $100 \text{ mW cm}^{-2}$  as calibrated by a China General Certification Center certified reference monocrystal silicon cell (Enlitech). Before the  $J$ – $V$  test, a physical mask of an aperture with a precise area of  $0.04 \text{ cm}^2$  was used to define the device area. The external quantum efficiency (EQE) data were recorded with a QE-R3011 test system from Enli technology company (Taiwan).

### 3. Materials and Synthesis

4,7-Dibromo-5,6-dinitrobenzo[*c*][1,2,5]thiadiazole, 2-(5,6-difluoro-3-oxo-2,3-dihydro-1H-inden-1-ylidene)malononitrile (IC-2F), and 2-(6,7-difluoro-3-oxo-2,3-dihydro-1H-cyclopenta-*[b]*naphthalen-1-ylidene) malononitrile (NC-2F) were purchased from Derthon Optoelectronic Materials Science Technology. Other raw materials and all reagents using in the work were purchased from Energy Chemistry and Aladdin commercial sources and directly used without further purification. All reactions were carried out under the atmosphere without oxygen and water. Compounds from 1 to 5 were synthesized according to the previously reported procedure.<sup>1,2</sup>

**Synthesis** 1-(2,8-bis(4,4-bis(2-butyloctyl)-4H-cyclopenta[2,1-*b*:3,4-*b'*])dithiophen-2-yl)-3b,6a-dihydrobenzo[1,2-*b*:3,4-*b'*:6,5-*b''*]trithiophen-5-yl)-2-butyloctan-1-

**one (compound 6).** Under nitrogen atmosphere, the crude product compound 4 (2.00 g, 3.40 mmol), compound 5 (8.20 g, 10.2 mmol), and Pd(PPh<sub>3</sub>)<sub>2</sub>Cl<sub>2</sub> (0.48 g, 0.68 mmol) were separately added in 250 mL flask with 80 mL anhydrous THF. The mixture was stirred at 80 °C for 24 h. After cooling to room temperature, the reaction mixture was extracted with DCM (50 mL) and washed with H<sub>2</sub>O for three times. Thereinto, the organic phase was dried over anhydrous MgSO<sub>4</sub> and the solvent was removed under reduced pressure. Finally, the crude product was purified by column chromatography on silica gel to get the product as red solid (3.77 g, 76% yield). <sup>1</sup>H NMR (500 MHz, CDCl<sub>3</sub>) δ 7.75 (s, 1H), 7.60 (s, 1H), 7.24-7.18 (m, 4H), 6.99-6.94 (m, 2H), 3.49-3.39 (m, 1H), 2.06-1.80 (m, 8H), 1.62 (s, 4H), 1.41-1.20 (m, 8H), 1.14-0.81 (m, 72H), 0.79-0.64 (m, 30H). <sup>13</sup>C NMR (126 MHz, CDCl<sub>3</sub>) δ 198.7, 158.4, 158.3, 158.2, 143.2, 138.1, 138.0, 137.9, 137.7, 136.5, 136.0, 135.8, 135.4, 134.2, 132.2, 132.0, 131.5, 131.4, 129.5, 126.9, 125.5, 125.4, 122.5, 122.4, 120.7, 120.6, 116.8, 116.6, 53.9, 48.6, 44.6, 43.8, 42.4, 41.4, 40.4, 39.0, 38.8, 35.2, 35.1, 35.0, 34.8, 34.7, 33.7, 33.2, 32.9, 32.0, 31.9, 31.7, 31.6, 30.0, 29.6, 29.4, 29.1, 28.7, 28.6, 27.8, 26.9, 26.7, 26.4, 25.3, 23.0, 22.9, 22.8, 22.7, 22.6, 22.2, 20.7, 20.5, 20.2, 19.2, 18.8, 14.9, 14.4, 14.3, 14.1, 14.0, 12.0, 11.4. HR-MS (MALDI-TOF) m/z calcd. for (C<sub>90</sub>H<sub>134</sub>OS<sub>7</sub>): 1454.48. Found: 1454.30.

**Synthesis**                    **6,6'-(5-(2-butyloctanoyl)-3b,6a-dihydrobenzo[1,2-b:3,4-b':6,5-b'']trithiophene-2,8-diyl)bis(4,4-bis(2-butyloctyl)-4H-cyclopenta[2,1-b:3,4-b']dithiophene-2-carbaldehyde) (compound 7).** Compound 6 (2.00 g, 0.1.63 mmol) was dissolved in 20 ml dimethylformamide (DMF) in a degassed two-neck round-

bottom flask. The mixture was stirred at room temperature for 30 min. Afterwards, 1 mL phosphorus oxychloride ( $\text{POCl}_3$ ) was dropwise added in the mixture at 0 °C. The mixture was then stirred at the room temperature for 30 min. The reaction was carried out at 90 °C for 12 hours. After cooling to room temperature, the solution was extracted with DCM ( $3 \times 30$  mL) and washed with  $\text{H}_2\text{O}$  ( $3 \times 50$  mL). Thereafter, the organic phase was dried over  $\text{MgSO}_4$  and the solvent was removed under reduced pressure. Finally, the crude product was purified by column chromatography on silica gel (PE:DCM = 2:1) to get the product as red solid (1.66 g, 80% yield).  $^1\text{H}$  NMR (500 MHz,  $\text{CDCl}_3$ )  $\delta$  9.87 (d,  $J = 1.8$  Hz, 2H), 8.35 (s, 1H), 7.86 (s, 1H), 7.71 (s, 1H), 7.60 (s, 2H), 7.29 (s, 2H), 3.43 (t,  $J = 5.2$  Hz, 1H), 1.99 (d,  $J = 4.3$  Hz, 8H), 1.87 (dd,  $J = 14.2, 8.6$  Hz, 2H), 1.63 (s, 4H), 1.43-0.81 (m, 78H), 0.79-0.60 (m, 30H).  $^{13}\text{C}$  NMR (126 MHz,  $\text{CDCl}_3$ )  $\delta$  198.7, 182.5, 182.4, 162.7, 162.5, 162.4, 158.0, 157.9, 147.1, 143.8, 143.6, 140.6, 140.2, 137.4, 137.2, 136.5, 136.3, 134.4, 132.5, 132.3, 131.8, 130.6, 130.1, 126.7, 124.5, 124.0, 120.5, 119.1, 118.4, 118.2, 54.5, 48.7, 43.7, 35.3, 35.1, 34.9, 34.8, 34.5, 33.9, 33.2, 31.9, 31.7, 31.6, 31.5, 31.4, 30.3, 30.2, 30.0, 29.7, 29.6, 29.5, 29.4, 28.7, 28.6, 27.8, 26.4, 23.0, 22.8, 22.7, 22.6, 14.1, 14.0, 14.9. HR-MS (MALDI-TOF)  $m/z$  calcd. for ( $\text{C}_{92}\text{H}_{134}\text{O}_3\text{S}_7$ ): 1510.49. Found: 1510.31.

**Synthesis of compound BTTBo-4F.** Compound 7 (0.20 g, 0.13 mmol) and IC-2F (0.12 g, 0.52 mmol) were dissolved in the mixture of chloroform and anhydrous pyridine (20 mL, v/v, 20/0.1) in a degassed two-neck round-bottom flask. The reaction was carried out at 60 °C for 12 hours. After removal of solvent under vacuum, the product was purified by flash chromatography with the eluent of dichloromethane/hexanes=2/1. The

resultant material was further purified by recrystallization chloroform/methanol (v/v = 1/5) before device application, to obtain a black solid (0.18 g, 82% yield). <sup>1</sup>H NMR (500 MHz, CDCl<sub>3</sub>) δ 8.90 (s, 1H), 8.81 (s, 1H), 8.45 (s, 1H), 8.35-8.25 (m, 2H), 7.87 (s, 1H), 7.72 (s, 2H), 7.64 (d, *J* = 7.3 Hz, 1H), 7.58 (s, 1H), 7.56-7.50 (m, 1H), 7.40 (d, *J* = 7.3 Hz, 2H), 3.48 (d, *J* = 5.9 Hz, 1H), 2.08 (dd, *J* = 17.7, 12.4 Hz, 8H), 1.97-1.87 (m, 2H), 1.69 (dd, *J* = 13.0, 7.0 Hz, 2H), 1.40-0.74 (m, 110H). <sup>13</sup>C NMR (126 MHz, CDCl<sub>3</sub>) δ 198.2, 185.9, 185.4, 166.2, 166.0, 159.7, 158.1, 157.8, 157.5, 155.3, 153.2, 153.1, 144.6, 144.2, 143.8, 139.6, 139.4, 138.3, 137.9, 137.7, 137.4, 137.3, 137.1, 136.3, 136.0, 134.6, 134.3, 132.5, 131.8, 130.4, 126.3, 120.7, 120.7, 119.6, 119.4, 119.3, 118.7, 114.9, 114.6, 114.4, 112.4, 112.2, 68.1, 67.7, 54.5, 54.4, 48.8, 43.8, 43.7, 35.3, 35.1, 35.0, 34.8, 34.2, 33.0, 32.6, 32.0, 31.9, 31.7, 29.9, 29.6, 29.5, 28.6, 28.5, 27.7, 26.4, 26.3, 26.2, 23.0, 22.90, 22.7, 22.6, 14.2, 14.1, 14.0. HR-MS (MALDI-TOF) *m/z* calcd. for (C<sub>116</sub>H<sub>138</sub>F<sub>4</sub>N<sub>4</sub>O<sub>3</sub>S<sub>7</sub>): 1934.80. Found: 1934.22.

**Synthesis of compound BTTBo-4FN.** Compound 7 (0.20 g, 0.13 mmol) and NC-2F (0.15 g, 0.52 mmol) were dissolved in the mixture of chloroform and anhydrous pyridine (20 mL, v/v, 20/0.1) in a degassed two-neck round-bottom flask. The reaction was carried out at 65 °C for 12 hours. After removal of solvent under vacuum, the product was purified by flash chromatography with the eluent of dichloromethane/hexanes=2/1. The resultant material was further purified by recrystallization chloroform/methanol (v/v = 1/5) before device application, to obtain a black solid (0.23 g, 85% yield). <sup>1</sup>H NMR (500 MHz, CDCl<sub>3</sub>) δ 8.95 (d, *J* = 27.7 Hz, 4H), 8.36-8.14 (m, 3H), 7.90-7.51 (m, 8H), 7.36 (d, *J* = 7.3 Hz, 2H), 3.47 (d, *J* = 5.5



Hz, 1H), 2.02 (d,  $J = 76.6$  Hz, 10H), 1.71 (s, 2H), 1.43-0.65 (m, 110H).  $^{13}\text{C}$  NMR (126 MHz,  $\text{CDCl}_3$ )  $\delta$  198.31, 187.5, 166.4, 166.3, 159.8, 158.3, 153.4, 151.0, 144.6, 144.2, 140.4, 138.4, 137.3, 137.0, 136.3, 135.3, 134.5, 133.3, 132.5, 130.3, 126.4, 125.3, 123.0, 121.9, 120.5, 116.5, 116.0, 115.3, 66.3, 54.4, 48.9, 43.8, 35.1, 34.8, 34.2, 33.1, 32.8, 31.9, 31.8, 30.0, 29.7, 28.6, 28.5, 27.8, 26.4, 26.3, 23.1, 23.0, 22.7, 22.7, 14.2, 14.1, 14.0. HR-MS (MALDI-TOF)  $m/z$  calcd. for  $(\text{C}_{124}\text{H}_{142}\text{F}_4\text{N}_4\text{O}_3\text{S}_7)$ : 2034.92. Found: 2037.44.

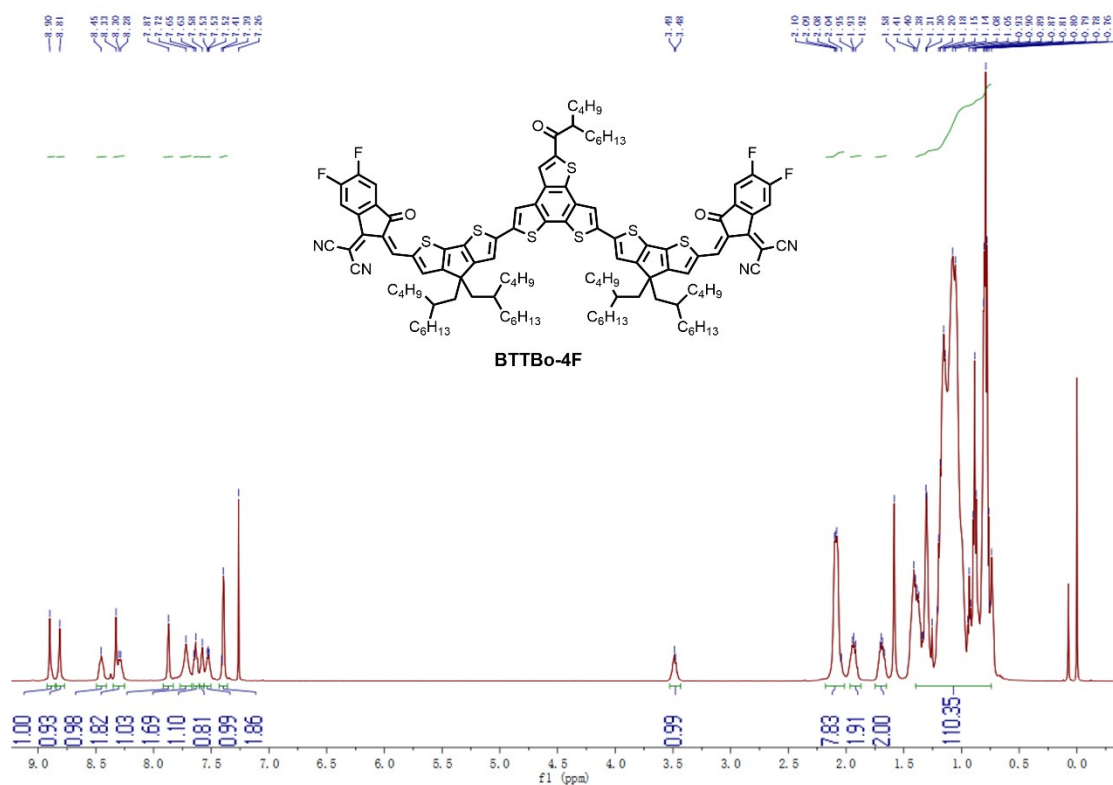

**Fig. S1**  $^1\text{H}$ -NMR (500 MHz) spectrum of **BTTBo-4F**.

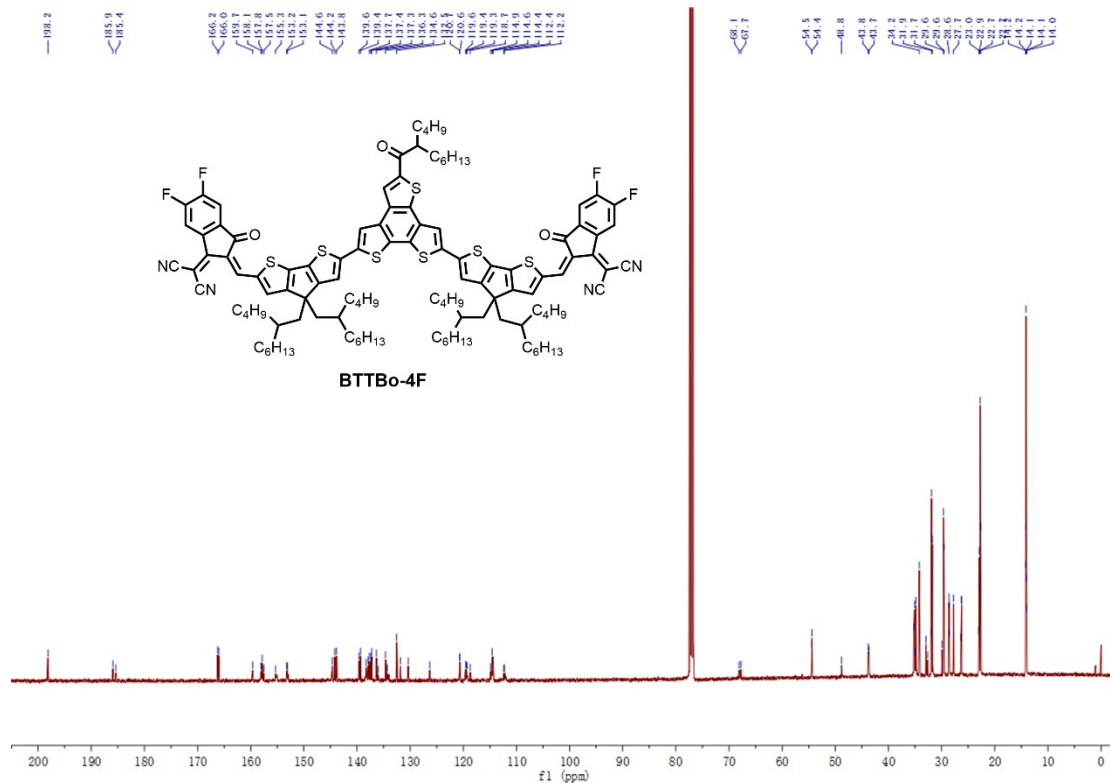

**Fig. S2**  $^{13}\text{C}$ -NMR (126 MHz) spectrum of BTTBo-4F.

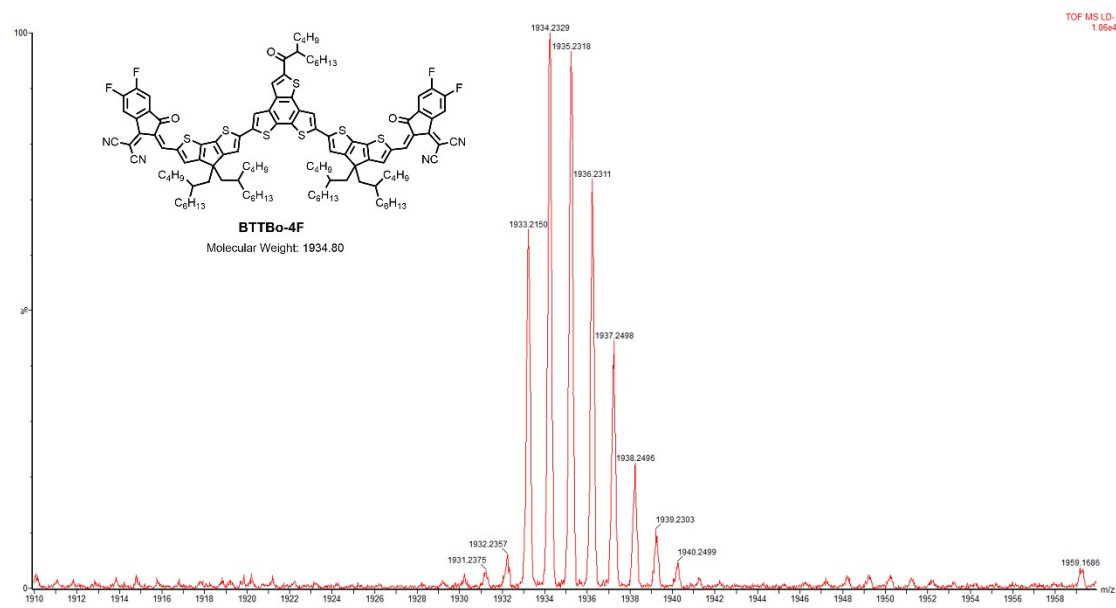

**Fig. S3** The high-resolution mass spectrum (MALDI-TOF) of BTTBo-4F.



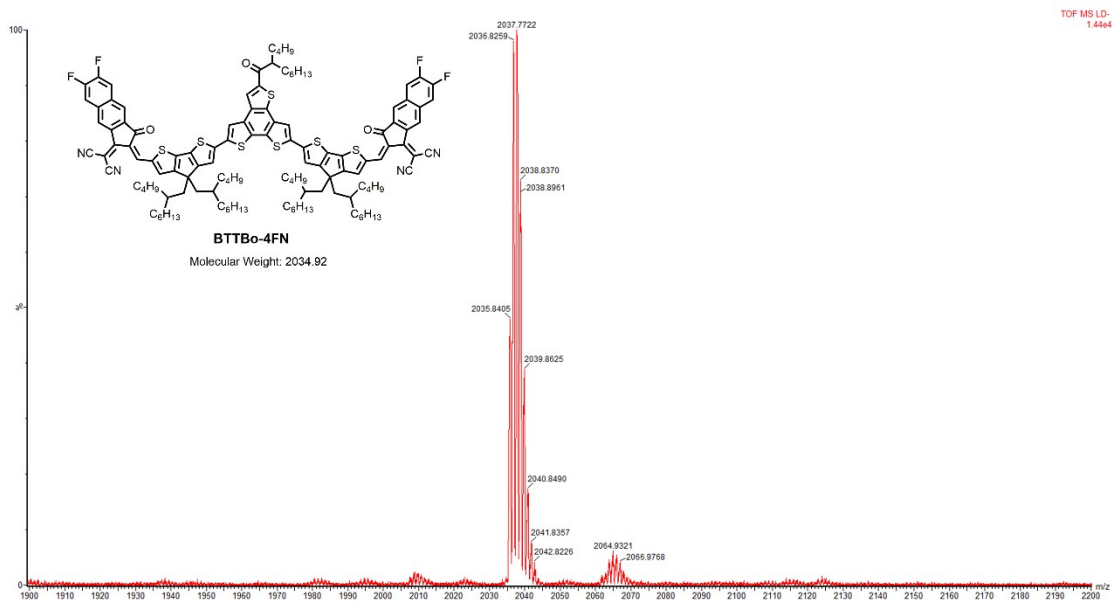

**Fig. S6** The high-resolution mass spectrum (MALDI-TOF) of BTTBo-4FN.

#### 4. Thermal Properties

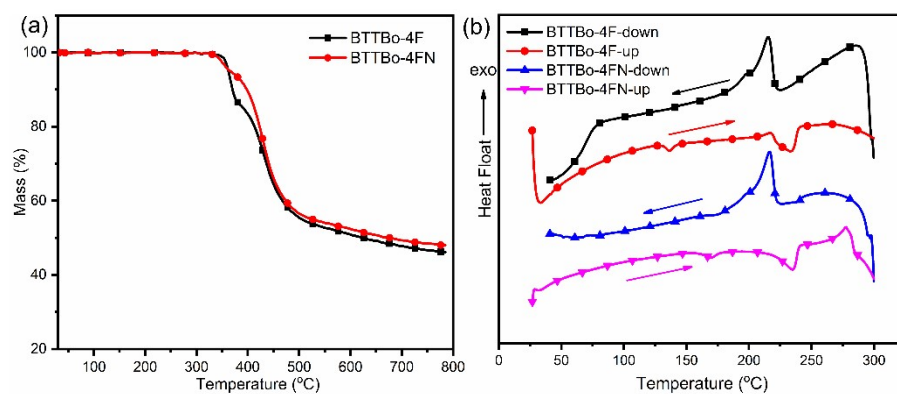

**Fig. S7** (A) TG curves of BTTBo-4F and BTTBo-4FN; (B) DSC curves of BTTBo-4F and BTTBo-4FN with a heating/cooling rate of 10/20 °C min<sup>-1</sup>.

## 5. DFT calculation

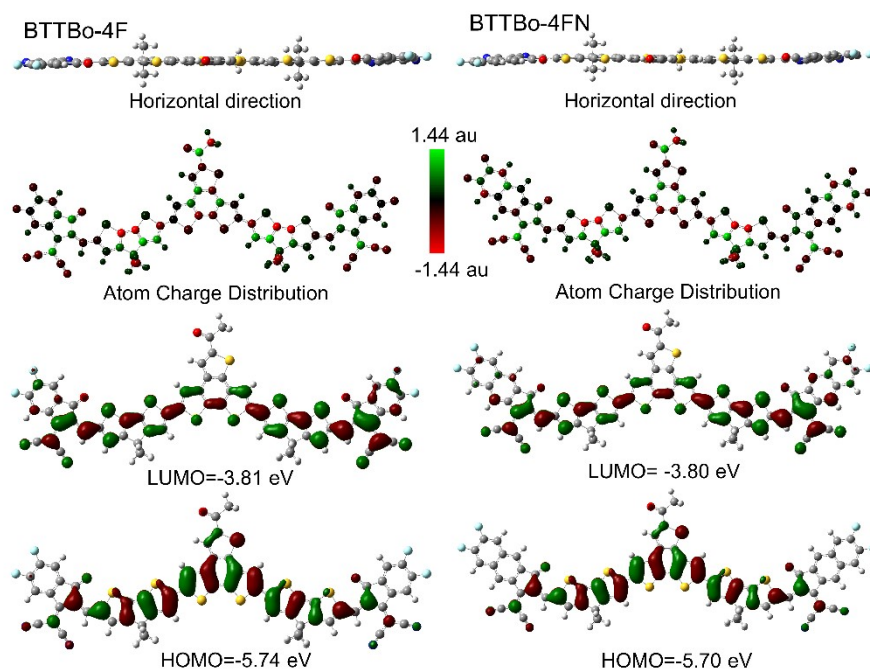

**Fig. S8** Optimized geometry, atom charge distribution and energy levels of BTTBo-4F and BTTBo-4FN calculated by the DFT calculation.

## 6. Hole and Electron Mobility

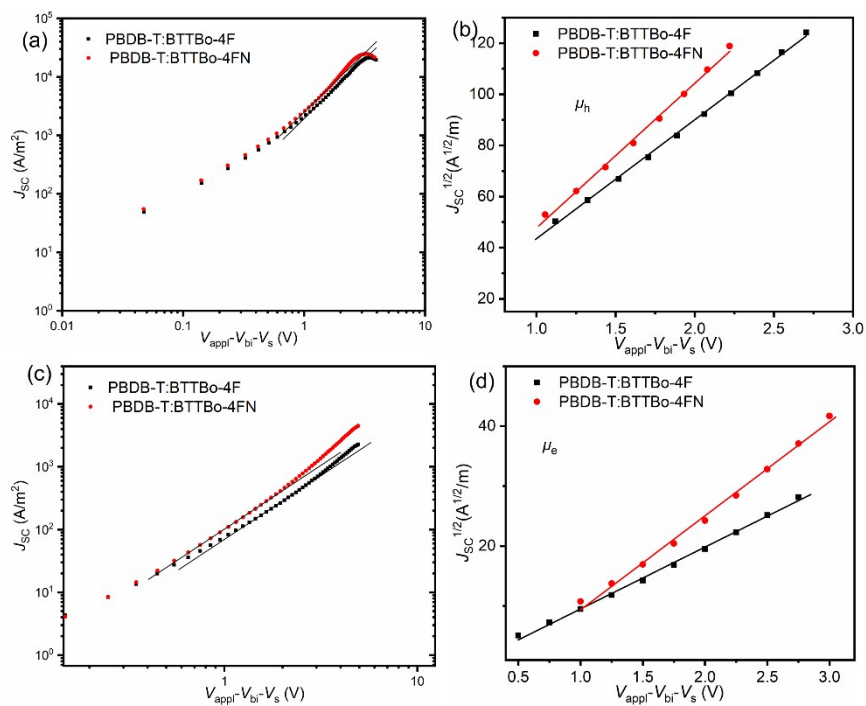

**Fig. S9** (a)  $J$ - $V$  characteristics of hole-only PBDB-T:NFEA blend devices; (b)  $J^{1/2}$ - $V$  characteristics of hole-only PBDB-T:NFEA blend devices; (c)  $J$ - $V$  characteristics of electron-only device based on PBDB-T:NFEA blend films; (d)  $J^{1/2}$ - $V$  characteristics of electron-only device based on PBDB-T:NFEA blend films.

## 7. Film Microstructure and Morphology

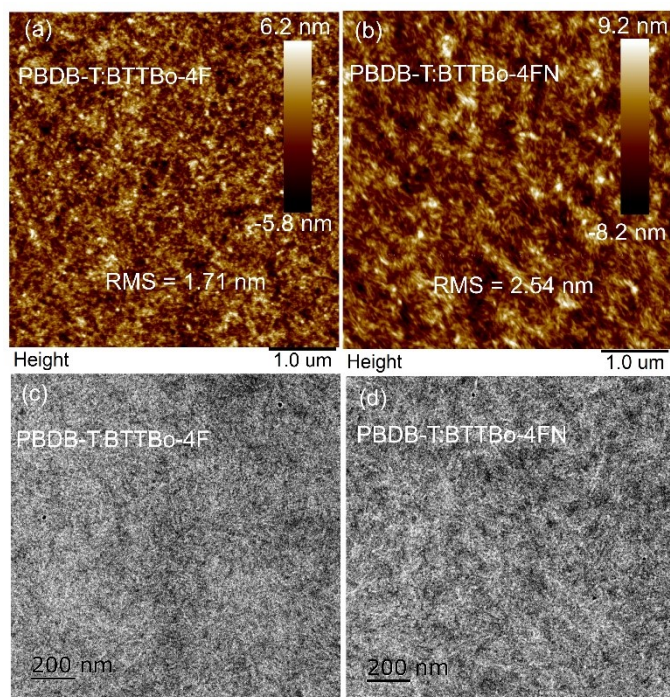

**Fig. S10.** (a, b) AFM height images (5×5 μm) and (c, d) TEM images of the blend films.

## 8. Device data

**Table S1.** Device structure: Glass/ITO/PEDOT:PSS/ PBDB-T (7mg/mL in CB):A/PFN-Br/Ag with 0.5% CN and thermal annealing 100 °C for 10 min.

| A         | D:A    | $V_{OC}$ (V) | $J_{SC}$ (mA/cm <sup>2</sup> ) | FF (%)     | PCEs(%)    | PCE <sub>max</sub> |
|-----------|--------|--------------|--------------------------------|------------|------------|--------------------|
|           | 1:1.20 | 0.84±0.00    | 13.99±0.17                     | 49.78±0.13 | 5.48±0.07  | 6.55               |
| BTTBo-4F  | 1:1.50 | 0.85±0.00    | 14.52±0.16                     | 60.98±3.23 | 7.51±0.53  | 8.07               |
|           | 1:1.70 | 0.83±0.00    | 12.62±0.18                     | 59.91±2.06 | 6.30±0.30  | 6.60               |
|           | 1:1.20 | 0.84±0.00    | 18.61±0.91                     | 69.47±0.99 | 10.84±0.49 | 11.09              |
| BTTBo-4FN | 1:1.50 | 0.84±0.00    | 19.40±0.11                     | 68.72±0.21 | 11.14±0.06 | 11.26              |
|           | 1:1.70 | 0.84±0.00    | 19.00±0.57                     | 67.22±0.65 | 10.68±0.25 | 10.95              |



**Table S2.** Device structure: Glass/ITO/PEDOT:PSS/PBDB-T(7mg/mL in CB):A /PFN-Br /Ag with 0.5% CN and thermal annealing 100 °C for 10 min.

| D:A                      | Rotate speed (r/s) | $V_{OC}$ (V) | $J_{SC}$ (mA/cm <sup>2</sup> ) | FF (%)     | PCEs(%)    | PCE <sub>max</sub> |
|--------------------------|--------------------|--------------|--------------------------------|------------|------------|--------------------|
| PBDB-T:BTTBo-4F(1:1.50)  | 1500               | 0.85±0.00    | 14.51±0.18                     | 60.63±0.21 | 7.48±0.10  | 7.57               |
|                          | 1800               | 0.85±0.00    | 14.52±0.16                     | 60.98±3.23 | 7.51±0.53  | 8.07               |
|                          | 2000               | 0.85±0.00    | 14.93±0.21                     | 64.09±0.62 | 8.14±0.13  | 8.27               |
|                          | 2200               | 0.85±0.00    | 14.68±0.08                     | 61.33±1.20 | 7.65±0.11  | 7.76               |
|                          | 2500               | 0.85±0.00    | 14.44±0.12                     | 59.59±1.15 | 7.28±0.13  | 7.40               |
| PBDB-T:BTTBo-4FN(1:1.50) | 1500               | 0.83±0.00    | 19.04±0.10                     | 66.22±1.18 | 10.53±0.25 | 10.76              |
|                          | 1800               | 0.84±0.00    | 19.40±0.11                     | 68.72±0.21 | 11.14±0.06 | 11.26              |
|                          | 2000               | 0.84±0.00    | 19.62±0.21                     | 69.33±2.70 | 11.46±0.38 | 11.60              |
|                          | 2200               | 0.84±0.00    | 19.42±0.17                     | 69.47±0.29 | 11.39±0.06 | 11.49              |
|                          | 2500               | 0.84±0.00    | 19.04±0.06                     | 69.83±0.53 | 11.22±0.13 | 11.34              |

## 9. Reference

1. C. B. Nielsen, J. M. Fraser, B. C. Schroeder, J. Du, A. J. P. White, W. Zhang and I. McCulloch, *Org. Lett.*, 2011, **13**, 2414-2417.
2. Z. Yao, Y. Li, S. Li, J. Xiang, X. Xia, X. Lu, M. Shi and H. Chen, *ACS Appl. Energy Mater.*, 2020, **4**, 819-827.
